# Supplementary material for: Phosphorylation of IRS4 by CK1γ2 promotes its degradation by CHIP through the ubiquitin/lysosome pathway
Source: PubMed Central journal article supplement — Theranostics. 2018 Jun 7;8(13):3643–53. doi: 10.7150/thno.26021 (PMC6037025; doi:10.7150/thno.26021), 2018-06-07
Supplement: thnov08p3643s1.pdf [file thnov08p3643s1.pdf]

## **Supplementary Information**

### **Phosphorylation of IRS4 by CK1 $\gamma$ 2 promotes its degradation by CHIP through the ubiquitin/lysosome pathway**

Xinchun Li<sup>1#</sup>, Li Zhong<sup>1#</sup>, Zhuo Wang<sup>2#</sup>, Huiming Chen<sup>1</sup>, Dan Liao<sup>1</sup>, Ruhua Zhang<sup>1</sup>, Hongyu Zhang<sup>3\*</sup> and Tiebang Kang<sup>1\*</sup>

**Running title: Regulation of IRS4 by CK1 $\gamma$ 2 and CHIP**

**Figures S1, S2, S3, S4, S5, S6, S7 and their figure legends**



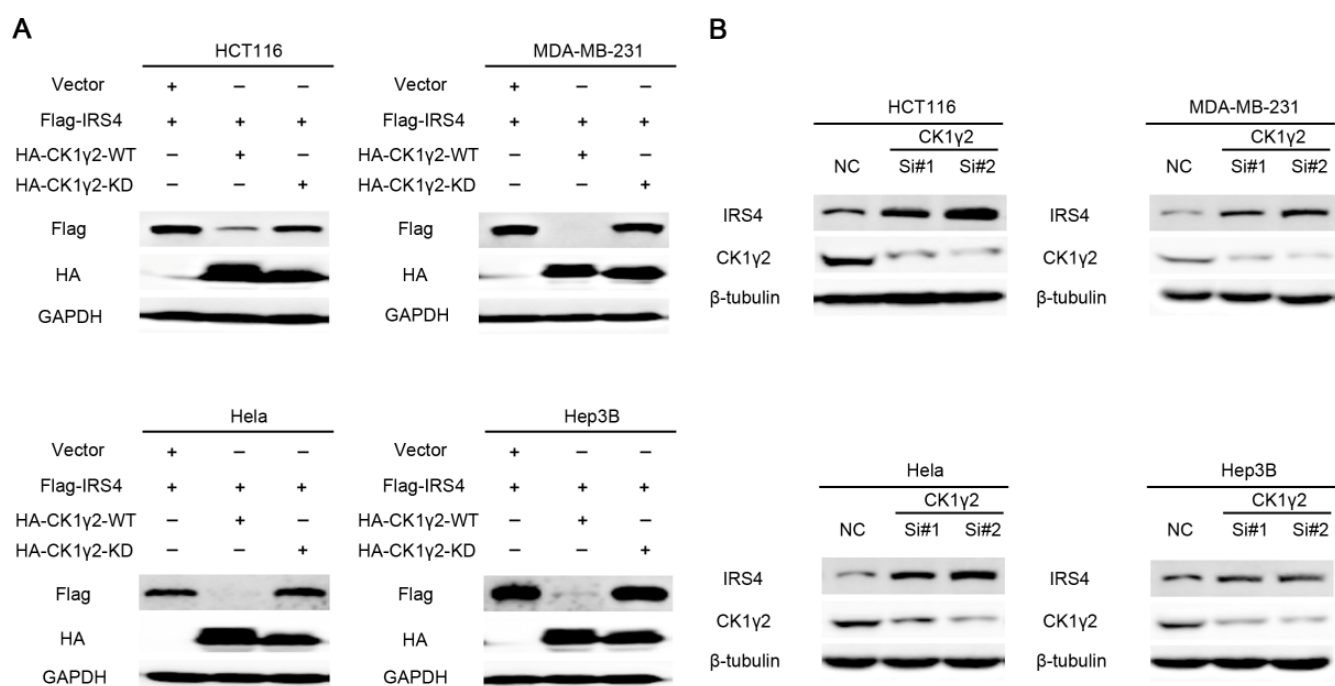

**Supplementary Figure S2. CK1γ2 negatively regulates IRS4 in multiple cancer cell lines.** (A) The indicated tumor cells were co-transfected with HA-tagged wild type (WT) or kinase-depleted (KD) CK1γ2 plasmids with Flag-IRS4 for 48 h and then were analyzed by Western blotting. (B) The indicated cells were transfected with CK1γ2 siRNAs and then were analyzed by Western blotting.

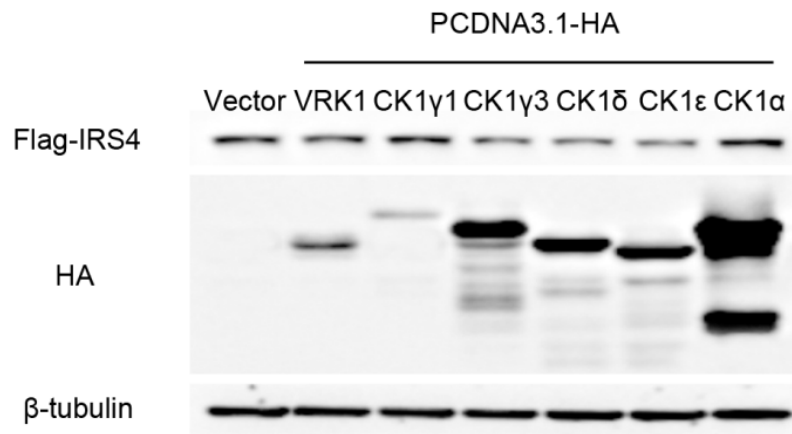

**Supplementary Figure S3. Other CK1 family members such as CK1γ3, CK1δ and CK1ε, but neither CK1α, CK1γ1 nor VRK1, also down-regulate IRS4 in 293T cells.** 293T cells were co-transfected with Flag-IRS4 and each of the indicated HA-tagged plasmids of CK1 family members for 48 h, and then analyzed by Western blotting.

**A**

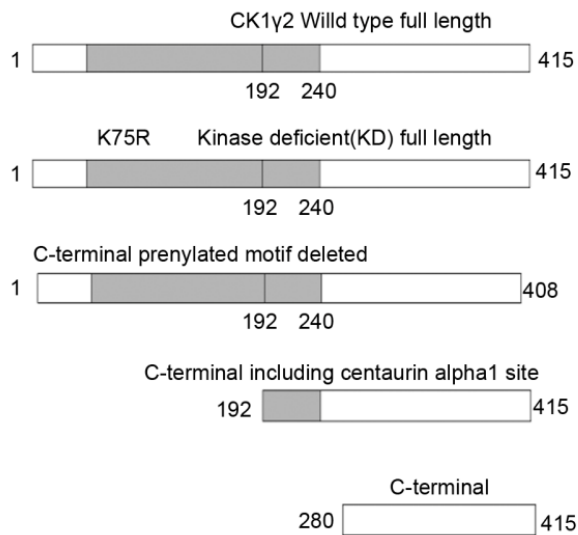

**B**

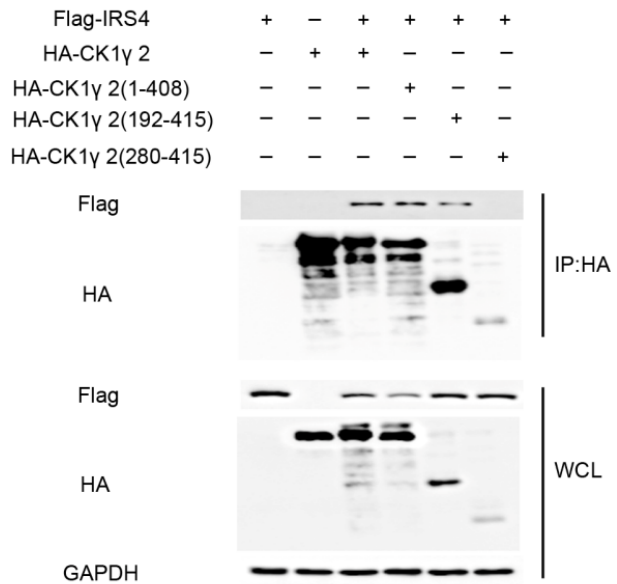

**Supplementary Figure S4. Mapping of the interaction domain of CK1γ2 with IRS4.**(A) Schematic representations of CK1γ2 constructs used in Co-IP assays. (B) 293T cells co-transfected with Flag-IRS4 and several HA-tagged CK1γ2 deletion mutants for 48 h were lysed and immunoprecipitated using anti-HA-agarose followed by Western blotting.

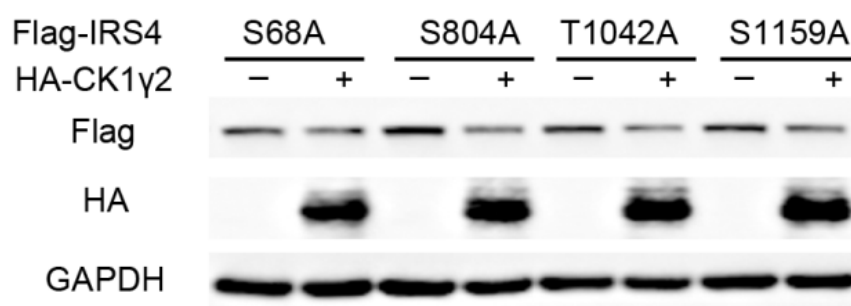

**Supplementary Figure S5. Ser859 of IRS4 may be the predominant phosphorylation site by CK1 $\gamma$ 2.** 293T cells were co-transfected with HA-CK1 $\gamma$ 2 and Flag-tagged IRS4-S868A, -S804A, -T1042A or-S1159A for 48 h, as indicated, and then analyzed by Western blotting.

**A**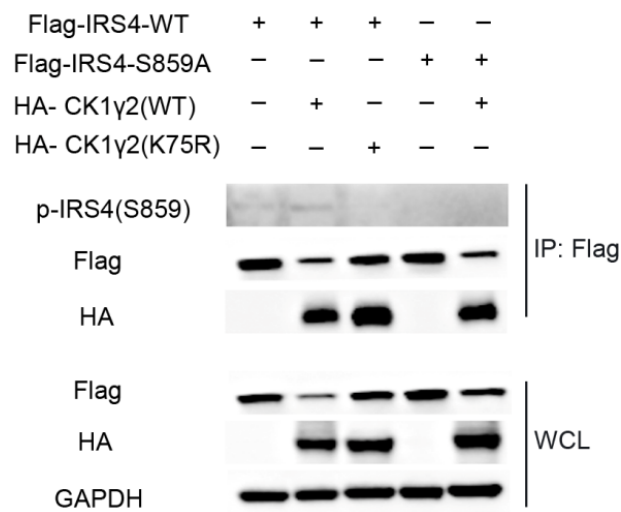**B**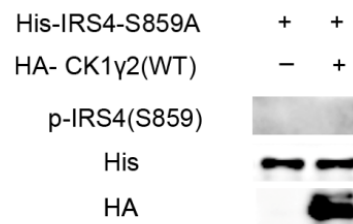

**Supplementary Figure S6. CK1γ2 phosphorylates IRS4 at Ser859 in vitro and in vivo.** (A) 293T cells were co-transfected with Flag-tagged IRS4-WT or -S859A with HA-tagged WT or KD CK1γ2 for 48 h, as indicated. Then cell lysates were analyzed by Western blotting using the p-IRS4-S859 antibody we generated. Note: the phospho-specific anti-p-IRS4-S859 antibody was successfully produced. (B) His-tagged IRS4 S859A mutant translated in vitro was incubated with HA-CK1γ2 immunoprecipitated from 293T cells using anti-HA agarose in the presence of ATP for 2 h, as indicated. The samples were then analyzed by Western blotting.

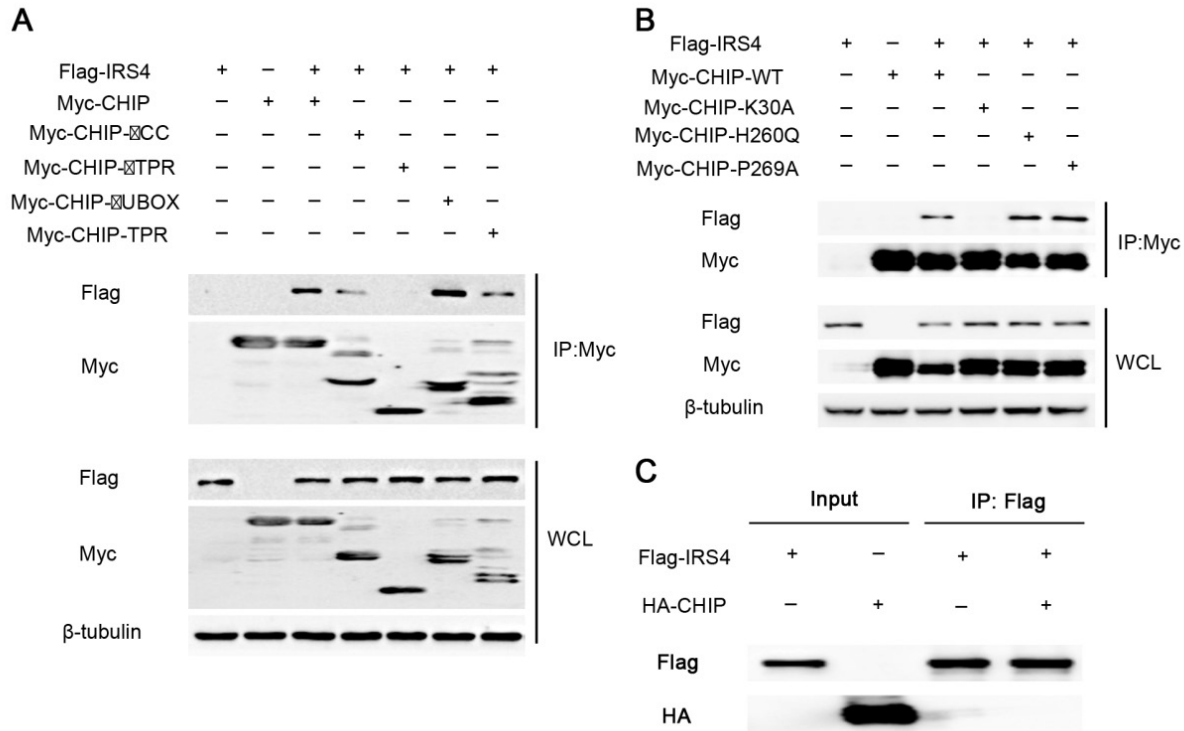

**Supplementary Figure S7. The E3 ligase CHIP is involved in the degradation of IRS4.** (A) 293T cells co-transfected with Flag-IRS4 and Myc-tagged CHIP deletion mutants for 48 h were lysed and immunoprecipitated using anti-Myc-agarose followed by Western blotting. (B) 293T cells co-transfected with Myc-tagged WT or mutant CHIP plasmids with Flag-IRS4 for 48 h were lysed and immunoprecipitated using anti-Myc-agarose followed by Western blotting. (C) Flag-IRS4 and HA-CHIP purified from 293T cells was incubated for 4 h at 4°C, and then protein mixtures were immunoprecipitated using anti-Flag agarose overnight. The samples were then analyzed by Western blotting.
